# Supplementary material
Source: PubMed Central journal article supplement (PMC4615529)
Supplement: NIHMS713263-supplement-supplemental_material.pdf [file NIHMS713263-supplement-supplemental_material.pdf]

**Supplemental Material: Wrist Fracture and Risk of Subsequent Fracture: Post-hoc Findings from the Women’s Health Initiative Study**

Supplemental Table 1. Additional baseline characteristics, by wrist fracture, among WHI CT and OS participants-Page 2

Supplemental Table 2. Associations between incident wrist fracture and any subsequent non-wrist fracture by baseline characteristics and age at wrist fracture-Page 4

Supplemental Table 3. Associations between incident wrist fracture and any subsequent non-wrist fracture or death overall and by age at wrist fracture-Page 5

Supplemental Table 4. Adjusted associations between wrist fracture and subsequent non-wrist fracture in the subset of participants for whom baseline BMD information was available (n = 11,350) –Page 6

**Supplemental Table 1. Additional baseline characteristics, by wrist fracture, among WHI CT and OS participants \***

|                                                             | Wrist Fracture <sup>†</sup> |                |              | p-value |
|-------------------------------------------------------------|-----------------------------|----------------|--------------|---------|
|                                                             | Total                       | No             | Yes          |         |
|                                                             | N (%)                       | N (%)          | N (%)        |         |
| <b>Annual Family Income</b>                                 |                             |                |              |         |
| Less than \$10,000                                          | 6,817 (4.4)                 | 6,495 (4.4)    | 322 (3.8)    | 0.007   |
| \$10,000 to \$19,999                                        | 18,350 (11.9)               | 17,344 (11.9)  | 1,006 (11.9) |         |
| \$20,000 to \$34,999                                        | 36,490 (23.6)               | 34,385 (23.5)  | 2,105 (24.9) |         |
| \$35,000 to \$49,999                                        | 30,791 (19.9)               | 29,073 (19.9)  | 1,718 (20.3) |         |
| \$50,000 to \$74,999                                        | 29,842 (19.3)               | 28,228 (19.3)  | 1,614 (19.1) |         |
| \$75,000 to \$99,999                                        | 13,563 (8.8)                | 12,812 (8.8)   | 751 (8.9)    |         |
| \$100,000 to \$149,999                                      | 9,407 (6.1)                 | 8,938 (6.1)    | 469 (5.5)    |         |
| \$150,000 or more                                           | 4,909 (3.2)                 | 4,658 (3.2)    | 251 (3.0)    |         |
| Don't know                                                  | 4,331 (2.8)                 | 4,107 (2.8)    | 224 (2.6)    |         |
| Missing                                                     | 6,430                       | 6,098          | 332          |         |
| <b>Hormone Therapy (HT)</b>                                 |                             |                |              |         |
| <b>Trial Arm</b>                                            |                             |                |              |         |
| Not randomized to HT                                        | 133,687 (83.1)              | 126,536 (83.2) | 7,151 (81.3) | <0.001  |
| E-alone intervention <sup>‡</sup>                           | 5,283 (3.3)                 | 5,032 (3.3)    | 251 (2.9)    |         |
| E-alone control                                             | 5,405 (3.4)                 | 5,039 (3.3)    | 366 (4.2)    |         |
| E+P intervention                                            | 8,478 (5.3)                 | 8,008 (5.3)    | 470 (5.3)    |         |
| E+P control                                                 | 8,077 (5.0)                 | 7,523 (4.9)    | 554 (6.3)    |         |
|                                                             |                             |                |              |         |
| <b>Dietary Modification (DM)</b>                            |                             |                |              |         |
| <b>Trial Arm</b>                                            |                             |                |              |         |
| Not randomized to Dietary Modification Trial                | 112,276 (69.8)              | 106,031 (69.7) | 6,245 (71.0) | 0.021   |
| Intervention                                                | 19,481 (12.1)               | 18,441 (12.1)  | 1,040 (11.8) |         |
| Control                                                     | 29,173 (18.1)               | 27,666 (18.2)  | 1,507 (17.1) |         |
| <b>Pack-years of cigarettes</b>                             |                             |                |              |         |
| Mean ± SD                                                   | 10.1 (17.9)                 | 10.0 (17.9)    | 10.5 (18.6)  | 0.012   |
| Missing                                                     | 4,975                       | 4700           | 275          |         |
| <b>Moderate-strenuous activity episodes &gt;20 min/week</b> |                             |                |              |         |
| No activity                                                 | 24,263 (15.8)               | 23,068 (15.9)  | 1,195 (14.4) | <0.001  |
| Some activity of limited duration                           | 62,152 (40.5)               | 58,932 (40.6)  | 3,220 (38.8) |         |
| 2 - <4 episodes per week                                    | 27,336 (17.8)               | 25,763 (17.7)  | 1,573 (18.9) |         |
| 4 episodes per week                                         | 39,747 (25.9)               | 37,426 (25.8)  | 2,321 (27.9) |         |
| Missing                                                     | 7,432                       | 6,949          | 483          |         |
| <b>Strenuous activity episodes / week</b>                   |                             |                |              |         |
| 0                                                           | 115,323 (75.1)              | 109,172 (75.2) | 6,151 (74.0) | 0.023   |
| 1                                                           | 7,654 (5.0)                 | 7,269 (5.0)    | 385 (4.6)    |         |
| 2                                                           | 10,224 (6.7)                | 9,632 (6.6)    | 592 (7.1)    |         |
| 3                                                           | 11,901 (7.8)                | 11,207 (7.7)   | 694 (8.4)    |         |
| 4                                                           | 3,836 (2.5)                 | 3,611 (2.5)    | 225 (2.7)    |         |
| 5 or more                                                   | 4,560 (3.0)                 | 4,298 (3.0)    | 262 (3.2)    |         |
| Missing                                                     | 7,432                       | 6,949          | 483          |         |
| <b>Dietary Calcium (mg)</b>                                 |                             |                |              |         |

\* Values expressed as n (%) unless otherwise noted.

<sup>†</sup> Includes wrist fractures (radius, ulna, carpal bones) through the end of WHI extension phase

<sup>‡</sup> E-alone denotes estrogen alone, and E + P denotes estrogen + progestin

|                                              | Wrist Fracture <sup>†</sup> |                 |               | p-value |
|----------------------------------------------|-----------------------------|-----------------|---------------|---------|
|                                              | Total                       | No              | Yes           |         |
|                                              | 160,930                     | 152,138         | 8,792         |         |
|                                              | N (%)                       | N (%)           | N (%)         |         |
| Mean ± SD                                    | 815.9 (468.1)               | 815.1 (468.5)   | 829.7 (460.1) | 0.004   |
| Missing                                      | 296                         | 282             | 14            |         |
| <b>Dietary Vitamin D (IU)</b>                |                             |                 |               |         |
| Mean ± SD                                    | 173 (124)                   | 173 (124)       | 174 (122)     | 0.590   |
| Missing                                      | 296                         | 282             | 14            |         |
| <b>RAND Physical Function Score</b>          |                             |                 |               |         |
| Mean ± SD                                    | 81.1 (20.0)                 | 81.1 (20.1)     | 81.2 (19.6)   | 0.585   |
| Tertile 1                                    | 48,368 (30.6)               | 45,702 (30.6)   | 2,666 (30.8)  | 0.163   |
| Tertile 2                                    | 51,093 (32.4)               | 48,227 (32.3)   | 2,866 (33.1)  |         |
| Tertile 3                                    | 58,404 (37.0)               | 55,279 (37.0)   | 3,125 (36.1)  |         |
| Missing                                      | 3,065                       | 2,930           | 135           |         |
| <b>Selective Estrogen Receptor Modulator</b> |                             |                 |               |         |
| No                                           | 160,886 (100.0)             | 152,097 (100.0) | 8,789 (100.0) | 0.632   |
| Yes                                          | 42 (0.0)                    | 39 (0.0)        | 3 (0.0)       |         |
| Missing                                      | 2                           | 2               | 0             |         |
| <b>Calcitonin</b>                            |                             |                 |               |         |
| No                                           | 160,453 (99.7)              | 151,709 (99.7)  | 8,744 (99.5)  | <0.001  |
| Yes                                          | 475 (0.3)                   | 427 (0.3)       | 48 (0.5)      |         |
| Missing                                      | 2                           | 2               | 0             |         |
| <b>Aromatase inhibitors</b>                  |                             |                 |               |         |
| No                                           | 160,921 (100.0)             | 152,129 (100.0) | 8,792 (100.0) | 0.525   |
| Yes                                          | 7 (0.0)                     | 7 (0.0)         | 0 (0.0)       |         |
| Missing                                      | 2                           | 2               | 0             |         |
| <b>Tamoxifen</b>                             |                             |                 |               |         |
| No                                           | 159,910 (99.4)              | 151,174 (99.4)  | 8,736 (99.4)  | 0.958   |
| Yes                                          | 1,018 (0.6)                 | 962 (0.6)       | 56 (0.6)      |         |
| Missing                                      | 2                           | 2               | 0             |         |
| <b>Anti-Depressants</b>                      |                             |                 |               |         |
| No                                           | 149,507 (92.9)              | 141,470 (93.0)  | 8,037 (91.4)  | <0.001  |
| Yes                                          | 11,421 (7.1)                | 10,666 (7.0)    | 755 (8.6)     |         |
| Missing                                      | 2                           | 2               | 0             |         |
| <b>Proton Pump inhibitors</b>                |                             |                 |               |         |
| No                                           | 157,552 (97.9)              | 148,983 (97.9)  | 8,569 (97.5)  | 0.003   |
| Yes                                          | 3,376 (2.1)                 | 3,153 (2.1)     | 223 (2.5)     |         |
| Missing                                      | 2                           | 2               | 0             |         |
| <b>Oral Corticosteroids</b>                  |                             |                 |               |         |
| No                                           | 159,812 (99.3)              | 151,087 (99.3)  | 8,725 (99.2)  | 0.425   |
| Yes                                          | 1,116 (0.7)                 | 1,049 (0.7)     | 67 (0.8)      |         |
| Missing                                      | 2                           | 2               | 0             |         |
| <b>Thiazolidinediones</b>                    |                             |                 |               |         |
| No                                           | 160,792 (99.9)              | 152,010 (99.9)  | 8,782 (99.9)  | 0.332   |
| Yes                                          | 136 (0.1)                   | 126 (0.1)       | 10 (0.1)      |         |
| Missing                                      | 2                           | 2               | 0             |         |

**Supplemental Table 2. Associations between incident wrist fracture and any subsequent non-wrist fracture by baseline characteristics and age at wrist fracture <sup>a</sup>**

|                                                                                               | person-years | Any non-wrist fracture<br>Event | Wrist Fracture |                    | P value <sup>b</sup> |
|-----------------------------------------------------------------------------------------------|--------------|---------------------------------|----------------|--------------------|----------------------|
|                                                                                               |              |                                 | No             | Yes<br>HR (95% CI) |                      |
| Current age                                                                                   |              |                                 |                |                    | 0.020                |
| <55                                                                                           | 58,038       | 652                             | 1 (ref)        | 2.49 (1.18-5.24)   |                      |
| 55-<60                                                                                        | 187,258      | 2,291                           | 1 (ref)        | 1.96 (1.43-2.68)   |                      |
| 60-<65                                                                                        | 316,832      | 4,626                           | 1 (ref)        | 1.64 (1.36-1.96)   |                      |
| 65-<70                                                                                        | 382,910      | 6,735                           | 1 (ref)        | 1.45 (1.26-1.66)   |                      |
| 70-<75                                                                                        | 356,914      | 7,373                           | 1 (ref)        | 1.35 (1.19-1.52)   |                      |
| 75-<80                                                                                        | 251,469      | 6,926                           | 1 (ref)        | 1.45 (1.31-1.62)   |                      |
| 80 or older                                                                                   | 139,235      | 5,375                           | 1 (ref)        | 1.24 (1.11-1.39)   |                      |
| Ethnicity                                                                                     |              |                                 |                |                    | 0.029                |
| White (not of Hispanic origin)                                                                | 67,075       | 30,231                          | 1 (ref)        | 1.39 (1.31-1.47)   |                      |
| Black or African-American                                                                     | 146,610      | 1,553                           | 1 (ref)        | 1.04 (0.64-1.67)   |                      |
| Hispanic/Latino                                                                               | 60,912       | 822                             | 1 (ref)        | 1.95 (1.35-2.83)   |                      |
| Other                                                                                         | 1,418,060    | 990                             | 1 (ref)        | 1.97 (1.43-2.71)   |                      |
| Total MET-hours per week                                                                      |              |                                 |                |                    | 0.070                |
| Q1 (0.00-2.25)                                                                                | 393,527      | 7,941                           | 1 (ref)        | 1.50 (1.33-1.68)   |                      |
| Q2 (2.33-8.29)                                                                                | 390,781      | 7,831                           | 1 (ref)        | 1.50 (1.34-1.68)   |                      |
| Q3 (8.33-17.71)                                                                               | 404,410      | 8,159                           | 1 (ref)        | 1.45 (1.30-1.62)   |                      |
| Q4 (17.75-142.33)                                                                             | 412,355      | 8,090                           | 1 (ref)        | 1.25 (1.11-1.40)   |                      |
| RAND Physical Function Score                                                                  |              |                                 |                |                    | 0.985                |
| T1 (0-75)                                                                                     | 465,717      | 1,1184                          | 1 (ref)        | 1.41 (1.28-1.55)   |                      |
| T2 (80-90)                                                                                    | 544,977      | 10,927                          | 1 (ref)        | 1.42 (1.29-1.56)   |                      |
| T3 (95-100)                                                                                   | 653,004      | 10,905                          | 1 (ref)        | 1.40 (1.27-1.54)   |                      |
| Falls                                                                                         |              |                                 |                |                    | 0.331                |
| None                                                                                          | 1,098,083    | 19,881                          | 1 (ref)        | 1.40 (1.30-1.51)   |                      |
| 1 time                                                                                        | 322,330      | 7,114                           | 1 (ref)        | 1.42 (1.27-1.59)   |                      |
| 2 times                                                                                       | 129,737      | 3,389                           | 1 (ref)        | 1.20 (1.02-1.42)   |                      |
| 3 or more times                                                                               | 62,466       | 1,904                           | 1 (ref)        | 1.48 (1.22-1.80)   |                      |
| WHO FRAX 10-yr predicted probability of fracture, quartile (range of absolute predicted risk) |              |                                 |                |                    | 0.072                |
| Q1 (0.66-5.47)                                                                                | 438,595      | 5,941                           | 1 (ref)        | 1.65 (1.41-1.92)   |                      |
| Q2 (5.48-8.34)                                                                                | 444,627      | 7,357                           | 1 (ref)        | 1.32 (1.16-1.50)   |                      |
| Q3 (8.35-12.94)                                                                               | 423,297      | 8,799                           | 1 (ref)        | 1.43 (1.29-1.58)   |                      |
| Q4 (12.95-83.91)                                                                              | 386,115      | 11,499                          | 1 (ref)        | 1.32 (1.21-1.44)   |                      |

<sup>a</sup> Adjusted for age, race, and BMI

<sup>b</sup> p-value for cross product interaction term between wrist fracture and characteristic being tested

**Supplemental Table 3. Associations between incident wrist fracture and any subsequent non-wrist fracture or death overall and by age at wrist fracture**

|             | Wrist Fracture |                                 |         | HR (95% CI)      | P value |
|-------------|----------------|---------------------------------|---------|------------------|---------|
|             | Total N        | Any non-wrist fracture<br>Event | No      |                  |         |
| Overall     | 159,118        | 48,049                          |         | 1.29 (1.23-1.35) |         |
| Current age | person-years   | Event                           |         | HR (95% CI)      | 0.003   |
| <55         | 58,038         | 712                             | 1 (ref) | 2.19 (1.04-4.62) |         |
| 55-<60      | 187,258        | 2,674                           | 1 (ref) | 1.87 (1.40-2.50) |         |
| 60-<65      | 316,832        | 5,712                           | 1 (ref) | 1.55 (1.31-1.83) |         |
| 65-<70      | 382,910        | 8,745                           | 1 (ref) | 1.28 (1.13-1.45) |         |
| 70-<75      | 356,914        | 10,307                          | 1 (ref) | 1.25 (1.12-1.39) |         |
| 75-<80      | 251,469        | 10,419                          | 1 (ref) | 1.36 (1.24-1.48) |         |
| 80 or older | 139,235        | 9,479                           | 1 (ref) | 1.16 (1.06-1.27) |         |

Adjusted for age, race, and BMI

p-value for cross product interaction term between wrist fracture and characteristic being tested

**Supplemental Table 4. Adjusted associations between wrist fracture and subsequent non-wrist fracture in the subset of participants for whom baseline BMD information was available (n = 11,350)**

|                                     |         |        | Wrist Fracture |                  |
|-------------------------------------|---------|--------|----------------|------------------|
|                                     |         |        | No             | Yes              |
|                                     | Total N | Event  |                | HR (95% CI)      |
| <b>Overall analytic sample</b>      |         |        |                |                  |
| <b>Any non-wrist fracture</b>       |         |        |                |                  |
| Crude                               | 160,930 | 33,979 | 1 (ref)        | 1.54 (1.46-1.62) |
| Model 1 <sup>a</sup>                | 159,118 | 33,596 | 1 (ref)        | 1.40 (1.33-1.48) |
| <b>BMD cohort (n=11,350)</b>        |         |        |                |                  |
| <b>Any non-wrist fracture</b>       |         |        |                |                  |
| Crude                               | 11,350  | 2,303  | 1 (ref)        | 1.59 (1.30-1.94) |
| Model 1                             | 11,260  | 2,291  | 1 (ref)        | 1.42 (1.16-1.74) |
| Crude + baseline Femoral Neck BMD   | 11,350  | 2,303  | 1 (ref)        | 1.36 (1.11-1.66) |
| Model 1 + baseline Femoral Neck BMD | 11,115  | 2,149  | 1 (ref)        | 1.30 (1.06-1.59) |

<sup>a</sup> Model 1 adjusted for age, race, and BMI
